# Supplementary material for: Diet and toenail arsenic concentrations in a New Hampshire population with arsenic-containing water
Source: PubMed Central journal article supplement (PMC3907042; doi:10.1186/1475-2891-12-149), 2013-11-16
Supplement: 1475-2891-12-149-S1.pdf [file 1475-2891-12-149-S1.pdf]

Additional Table 1. Conversions from FFQ responses to servings per day, assuming a 30-day month.

| <b>Response Option</b>          | <b>Midpoint of Interval</b> | <b>Servings per Day</b> |
|---------------------------------|-----------------------------|-------------------------|
| Never or less than once a month | 0                           | 0                       |
| 1-3 times per month             | 2 times/month               | 0.0667                  |
| Once per week                   | 1 time/week                 | 0.1429                  |
| 2-4 times per week              | 3 times/week                | 0.4286                  |
| 5-6 times per week              | 5.5 times/week              | 0.7857                  |
| Once per day                    | 1 time/day                  | 1                       |
| 2-3 times per day               | 2.5 times/day               | 2.5                     |
| 4-5 times per day               | 4.5 times/day               | 4.5                     |
| 6+ times per day                | 6 times/day                 | 6                       |
